# Supplementary material for: Effects of deposited Pt particles on the reducibility of CeO2(111)
Source: Royal Society of Chemistry journal article supplement (doi:10.1039/c1cp20950g), 2011-01-01

# ELECTRONIC SUPPLEMENTARY INFORMATION

## Effects of deposited Pt particles on the reducibility of CeO<sub>2</sub>(111)

Albert Bruix,<sup>1</sup> Annapaola Migani,<sup>1</sup> Georgi N. Vayssilov,<sup>2</sup> Konstantin M. Neyman,<sup>\*,1,3</sup>  
Jörg Libuda<sup>4,5</sup> and Francesc Illas<sup>\*,1</sup>

<sup>1</sup> *Departament de Química Física & Institut de Química Teòrica i Computacional (IQTCUB), Universitat de Barcelona, C/ Martí i Franquès 1, 08028 Barcelona, Spain*

<sup>2</sup> *Faculty of Chemistry, University of Sofia, 1126 Sofia, Bulgaria*

<sup>3</sup> *Institució Catalana de Recerca i Estudis Avançats (ICREA), 08010 Barcelona, Spain*

<sup>4</sup> *Lehrstuhl für Physikalische Chemie II, Friedrich-Alexander-Universität Erlangen-Nürnberg, Egerlandstraße 3, D-91058 Erlangen, Germany*

<sup>5</sup> *Erlangen Catalysis Resource Center, Friedrich-Alexander-Universität Erlangen-Nürnberg, Egerlandstraße 3, D-91058 Erlangen, Germany*

---

\* Corresponding authors. E-mail: konstantin.neyman@icrea.es and francesc.illas@ub.edu

**Table S1: Extended Table 4.** Calculated oxygen vacancy formation energies  $E_f^{\text{O}_{\text{vac}}}$  in four different positions (Roman numbers) of the  $\text{Pt}_8/\text{CeO}_2$  system. For a given vacancy position (I to IV) different solutions for the electronic structure are denoted by a superindex (i.e. different number of total unpaired electrons or location and amount of  $\text{Ce}^{3+}$  centers).  $|\mu|_{\text{av}} \text{Ce}^{3+}$  and  $|\mu_{\text{T}}| \text{Pt}_8$  correspond to the average magnitude on the  $\text{Ce}^{3+}$  cations and the total magnitude of the  $\text{Pt}_8$  cluster, respectively, and  $q(\text{Pt}_8)$  is the Bader charge of the  $\text{Pt}_8$  cluster.

| Model | Vacancy          | # $\text{Ce}^{3+}$ | $ \mu _{\text{av}} \text{Ce}^{3+}$ ( $\mu_{\text{B}}$ ) | $ \mu_{\text{T}}  \text{Pt}_8$ ( $\mu_{\text{B}}$ ) | $q(\text{Pt}_8)$ | $E_f(\text{O}_{\text{vac}})$ (eV) |
|-------|------------------|--------------------|---------------------------------------------------------|-----------------------------------------------------|------------------|-----------------------------------|
| Opt   | I <sup>1</sup>   | 4                  | 0.93                                                    | 0.02                                                | 0.53             | 2.73                              |
| Opt   | I <sup>2</sup>   | 4                  | 0.94                                                    | 1.50                                                | 0.56             | 2.91                              |
| Opt   | I <sup>3</sup>   | 4                  | 0.93                                                    | 0.05                                                | 0.53             | 2.76                              |
| Opt   | II <sup>1</sup>  | 3                  | 0.81                                                    | 0.36                                                | 0.01             | 2.46                              |
| Opt   | II <sup>2</sup>  | 3                  | 0.87                                                    | 1.11                                                | 0.09             | 2.48                              |
| Opt   | II <sup>3</sup>  | 3                  | 0.90                                                    | 2.37                                                | 0.17             | 2.83                              |
| Opt   | II <sup>4</sup>  | 4                  | 0.74                                                    | 0.94                                                | 0.16             | 2.75                              |
| Opt   | II <sup>5</sup>  | 4                  | 0.72                                                    | 0.79                                                | 0.14             | 2.74                              |
| Opt   | III <sup>1</sup> | 4                  | 0.83                                                    | 0.33                                                | 0.48             | 2.92                              |
| Opt   | IV <sup>1</sup>  | 5                  | 0.85                                                    | 0.25                                                | 0.76             | 2.53                              |
| Opt   | IV <sup>2</sup>  | 5                  | 0.79                                                    | 0.15                                                | 0.65             | 2.59                              |
| Opt   | IV <sup>3</sup>  | 4                  | 0.90                                                    | 0.10                                                | 0.63             | 2.62                              |
| Exp   | II <sup>1</sup>  | 2                  | 0.91                                                    | 0.06                                                | -0.08            | 2.34                              |
| Exp   | IV <sup>1</sup>  | 3                  | 0.94                                                    | 0.73                                                | 0.42             | 2.70                              |

**Table S2:** Energy ( $E_{\text{spill}}$ ) of reverse spillover of an oxygen atom from the  $\text{CeO}_2$  surface to the supported  $\text{Pt}_8$  cluster at the most stable positions of the vacancy  $\text{O}_{\text{vac}}$  and adsorbed atom  $\text{O}_{\text{ads}}$ .  $|\mu|_{\text{av}} \text{Ce}^{3+}$  and  $|\mu_{\text{T}}| \text{Pt}_8$  correspond to the average magnitude on the  $\text{Ce}^{3+}$  cations and the total magnitude of the  $\text{Pt}_8$  cluster, respectively.  $q(\text{Pt}_8)$  is the Bader charge of the  $\text{Pt}_8$  cluster.

| Model | $\text{O}_{\text{vac}}$ | $\text{O}_{\text{ads}}$ | $\#\text{Ce}^{3+}$ | $ \mu _{\text{av}} \text{Ce}^{3+} (\mu_{\text{B}})$ | $ \mu_{\text{T}}  \text{Pt}_8 (\mu_{\text{B}})$ | $q(\text{Pt}_8)$ | $E_{\text{spill}} (\text{eV})$ |
|-------|-------------------------|-------------------------|--------------------|-----------------------------------------------------|-------------------------------------------------|------------------|--------------------------------|
| Opt   | II                      | $\text{Pt}_2$           | 3                  | 0.85                                                | 1.03                                            | 0.79             | 1.00                           |
| Opt   | II                      | $\text{Pt}_3$           | 3                  | 0.82                                                | 0.32                                            | 0.88             | 1.24                           |
| Opt   | IV                      | $\text{Pt}_2$           | 4                  | 0.89                                                | 1.24                                            | 1.34             | 1.25                           |
| Exp   | II                      | $\text{Pt}_2$           | 3                  | 0.82                                                | 0.93                                            | 0.82             | 1.00                           |

**Table S3:** Energy ( $E_{\text{ads}}$ ) of oxygen adsorption computed with respect to  $1/2\text{O}_2$  at various  $\text{O}_{\text{ads}}$  positions of the  $\text{Pt}_8$  cluster supported on  $\text{CeO}_2(111)$ .  $|\mu|_{\text{av}} \text{Ce}^{3+}$  and  $|\mu_{\text{T}}| \text{Pt}_8$  correspond to the average magnitude on the  $\text{Ce}^{3+}$  cations and the total magnitude of the  $\text{Pt}_8$  cluster, respectively and  $q(\text{Pt}_8)$  is the Bader charge of the  $\text{Pt}_8$  cluster.

| $\text{O}_{\text{ads}}$ | $\#\text{Ce}^{3+}$ | $ \mu _{\text{av}} \text{Ce}^{3+} (\mu_{\text{B}})$ | $ \mu_{\text{T}}  \text{Pt}_8 (\mu_{\text{B}})$ | $q(\text{Pt}_8)$ | $E_{\text{ads}} (\text{eV})$ |
|-------------------------|--------------------|-----------------------------------------------------|-------------------------------------------------|------------------|------------------------------|
| $\text{Pt}_3$           | 2                  | 0.85                                                | 1.03                                            | 1.55             | -1.16                        |
| $\text{Pt}_2$           | 2                  | 0.93                                                | 1.38                                            | 1.43             | -1.30                        |

**Figure S1:** Top (left panels) and side (right panels) views of the most stable computed  $\text{Pt}_8/\text{CeO}_{2-x}(111)$  structures with an oxygen atom removed from different positions (I-IV) of the slab to the gas-phase. Red spheres – O, purple – Ce, blue – Pt, yellow and light blue – spin density.

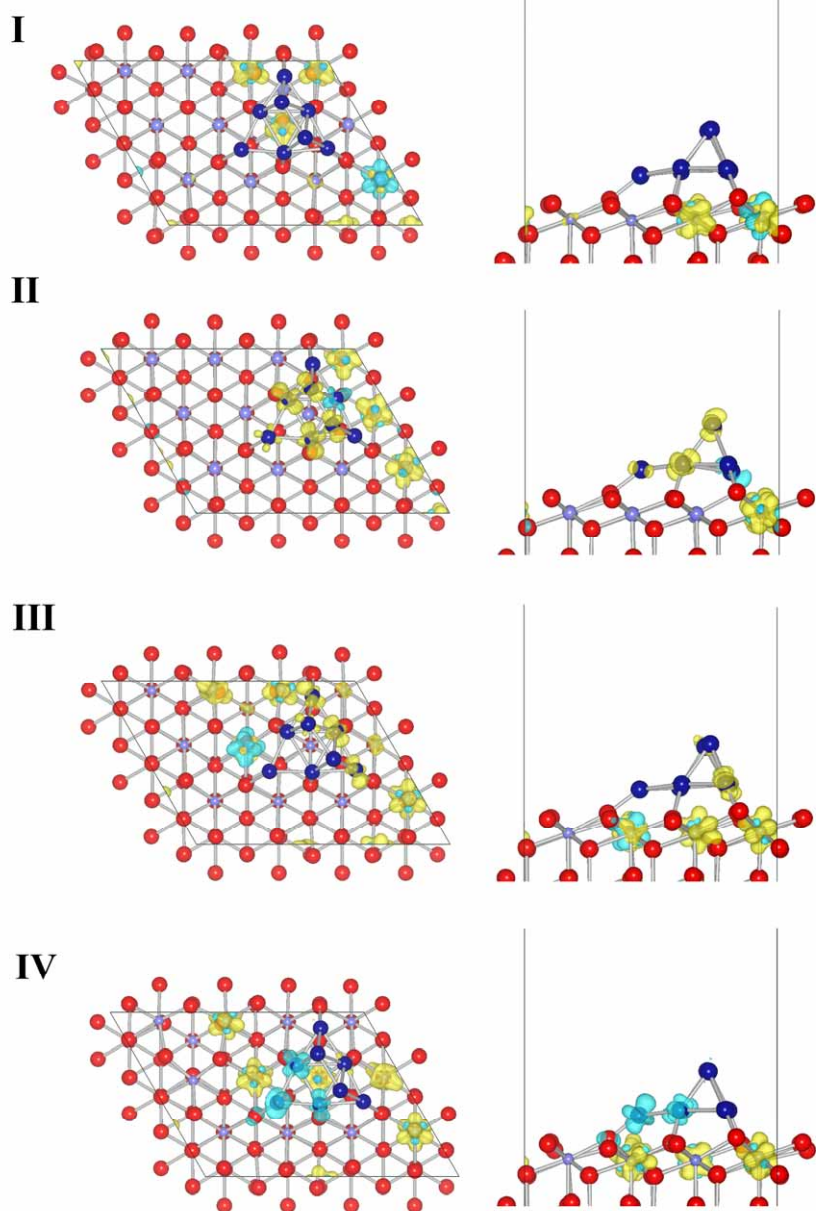

**Figure S2:** Top (left panels) and side (right panels) views of the most stable computed O-Pt<sub>8</sub>/CeO<sub>2-x</sub>(111) structures with an oxygen atom spilled-over from two different positions (II and IV) of the slab and adsorbed on different stable sites (Pt<sub>2</sub> and Pt<sub>3</sub>) of the Pt<sub>8</sub> particle. Red spheres – O, purple – Ce, blue – Pt, yellow and light blue – spin density.

**II:**

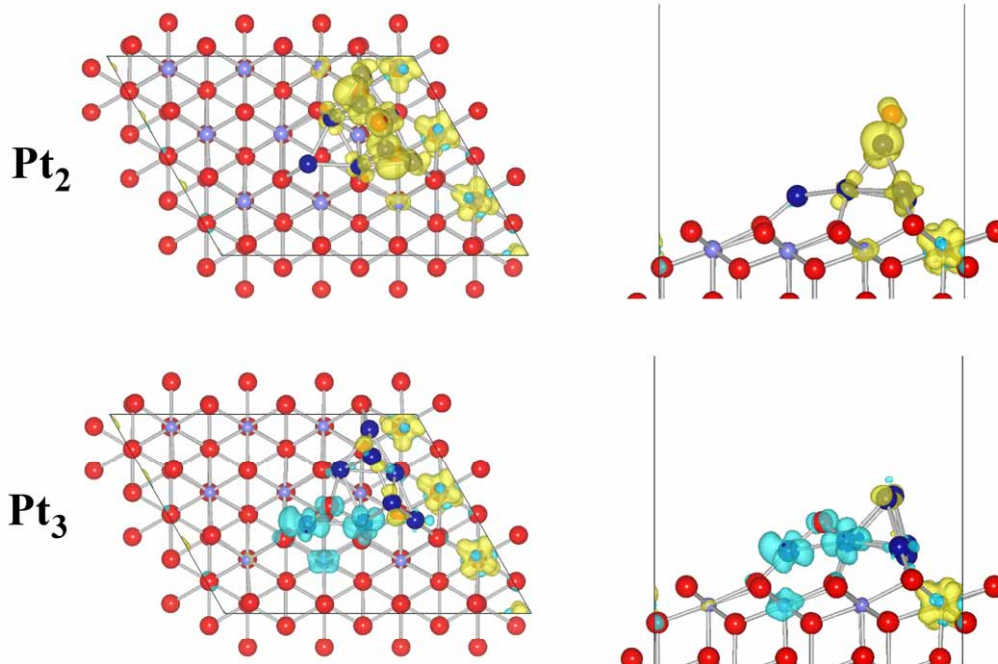

**IV:**

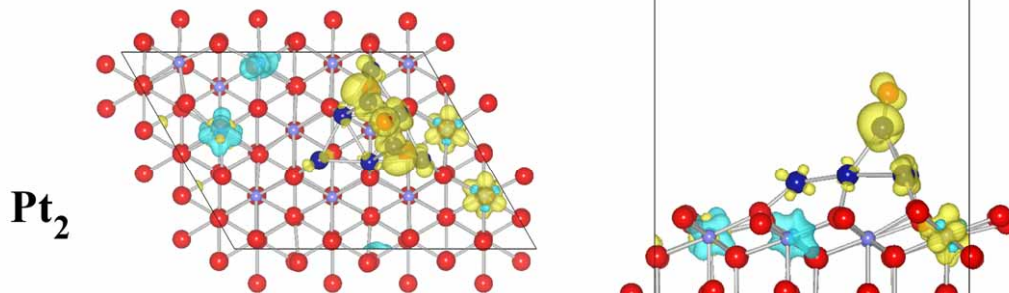

Supplement: c1cp20950g.pdf [file c1cp20950g.pdf]
